# Supplementary material for: Atomic Ru clusters supported on CeO2(110) for effectively catalyzing the electrochemical N2 reduction reaction: insights from density functional theory
Source: Royal Society of Chemistry journal article supplement (doi:10.1039/d4nj00210e), 2024-01-01
Supplement: d4nj00210e1.pdf [file d4nj00210e1.pdf]

**Atomic Ru cluster supported on CeO<sub>2</sub>(110) for effective catalyzing  
electrochemical N<sub>2</sub> reduction reaction: insights from density functional theory**

Heng Cao <sup>a</sup>, Shulan Zhou <sup>a,\*</sup>

*<sup>a</sup>School of Chemistry and Chemical Engineering, Shandong University of Technology,*

*Zibo 255049, Shandong, China*

\*Corresponding authors. Email: [zhoushulan2009@126.com](mailto:zhoushulan2009@126.com)

Table S1 Calculated binding energy of Ru<sub>n</sub> (n=1-6, 10) on CeO<sub>2</sub>(110), the optimized bond lengths and

Bader charge and the related donations of atoms are shown in Figure S3.

| Ru <sub>n</sub> /CeO <sub>2</sub> (110) | $E_b$ / eV | Bond                              | Bond length/Å | Atom    | Bader charge/ e |     |       |
|-----------------------------------------|------------|-----------------------------------|---------------|---------|-----------------|-----|-------|
| Ru <sub>1</sub> /CeO <sub>2</sub> (110) | -6.97      | Ru-O1                             | 1.962         | Ru      | 0.93            |     |       |
|                                         |            | Ru-O2                             | 2.025         | O1      | -0.95           |     |       |
|                                         |            | Ru-O3                             | 2.008         | O2      | -0.53           |     |       |
|                                         |            | Ru-O4                             | 1.988         | O3      | -0.43           |     |       |
|                                         |            |                                   |               | O4      | -0.93           |     |       |
|                                         |            |                                   |               | O5      | -1.31           |     |       |
|                                         |            |                                   |               | O6      | -1.18           |     |       |
|                                         |            |                                   |               | Ce1     | 2.42            |     |       |
|                                         |            |                                   |               | Ce2     | 0.52            |     |       |
|                                         |            |                                   |               | Ce3     | 2.34            |     |       |
|                                         |            |                                   |               | Ce4     | 2.10            |     |       |
|                                         |            | Ru <sub>2</sub> /CeO <sub>2</sub> | -8.83         | Ru1-Ru2 | 2.239           | Ru1 | 1.50  |
|                                         |            |                                   |               | Ru1-O1  | 1.861           | Ru2 | 0.18  |
|                                         |            |                                   |               | Ru1-O2  | 1.782           | O1  | -0.95 |
| Ru2-O3                                  | 1.876      |                                   |               | O2      | -1.04           |     |       |
| Ru2-O4                                  | 1.799      |                                   |               | O3      | -1.01           |     |       |
|                                         |            |                                   |               | O4      | -1.04           |     |       |
|                                         |            |                                   |               | O5      | -1.08           |     |       |
|                                         |            |                                   |               | O6      | -0.78           |     |       |
|                                         |            |                                   |               | Ce1     | 1.79            |     |       |
|                                         |            |                                   |               | Ce2     | 0.93            |     |       |
|                                         |            |                                   |               | Ce3     | 1.67            |     |       |
| Ru <sub>3</sub> /CeO <sub>2</sub>       | -9.27      |                                   |               | Ru1-Ru2 | 2.511           | Ru1 | 0.94  |
|                                         |            |                                   |               | Ru1-Ru3 | 2.339           | Ru2 | 0.60  |
|                                         |            |                                   |               | Ru2-Ru3 | 2.224           | Ru3 | 0.54  |
|                                         |            | Ru1-O1                            | 1.899         | O1      | -1.55           |     |       |
|                                         |            | Ru1-O2                            | 1.790         | O2      | -1.25           |     |       |
|                                         |            | Ru2-O3                            | 1.991         | O3      | -1.47           |     |       |
|                                         |            | Ru2-O4                            | 2.013         | O4      | -1.50           |     |       |
|                                         |            | Ru3-O5                            | 1.812         | O5      | -1.20           |     |       |
|                                         |            |                                   |               | O6      | -1.60           |     |       |
|                                         |            |                                   |               | O7      | -1.63           |     |       |
|                                         |            |                                   |               | Ce1     | 2.79            |     |       |
|                                         |            |                                   |               | Ce2     | 2.98            |     |       |
|                                         |            |                                   |               | Ce3     | 2.61            |     |       |
|                                         |            | Ru <sub>4</sub> /CeO <sub>2</sub> | -10.29        | Ru1-Ru2 | 2.223           | Ru1 | -0.34 |
| Ru1-Ru4                                 | 2.234      |                                   |               | Ru2     | 0.44            |     |       |
| Ru2-Ru3                                 | 2.352      |                                   |               | Ru3     | 1.27            |     |       |
| Ru3-Ru4                                 | 2.241      |                                   |               | Ru4     | 0.82            |     |       |
| Ru2-O1                                  | 1.938      |                                   |               | O1      | -0.91           |     |       |

|                                    |        |         |       |     |       |
|------------------------------------|--------|---------|-------|-----|-------|
|                                    |        | Ru2-O2  | 1.938 | O2  | -1.06 |
|                                    |        | Ru3-O3  | 1.822 | O3  | -1.13 |
|                                    |        | Ru3-O4  | 1.864 | O4  | -0.96 |
|                                    |        | Ru4-O5  | 1.817 | O5  | -1.19 |
|                                    |        |         |       | O6  | -1.21 |
|                                    |        |         |       | O7  | -1.19 |
|                                    |        |         |       | Ce1 | 2.16  |
|                                    |        |         |       | Ce2 | 2.31  |
|                                    |        |         |       | Ce3 | 1.42  |
| Ru <sub>5</sub> /CeO <sub>2</sub>  | -9.97  | Ru1-Ru2 | 2.280 | Ru1 | 0.41  |
|                                    |        | Ru1-Ru3 | 2.626 | Ru2 | 0.23  |
|                                    |        | Ru1-Ru4 | 2.645 | Ru3 | 0.49  |
|                                    |        | Ru1-Ru5 | 2.274 | Ru4 | 0.11  |
|                                    |        | Ru2-Ru3 | 2.374 | Ru5 | 0.05  |
|                                    |        | Ru2-Ru5 | 2.892 | O1  | -0.85 |
|                                    |        | Ru3-Ru4 | 2.256 | O2  | -1.13 |
|                                    |        | Ru4-Ru5 | 2.389 | O3  | -1.26 |
|                                    |        | Ru2-O1  | 1.800 | O4  | -0.90 |
|                                    |        | Ru3-O2  | 1.926 | O5  | -0.74 |
|                                    |        | Ru4-O3  | 1.912 | O6  | -1.16 |
|                                    |        | Ru5-O4  | 1.776 | Ce1 | 2.12  |
|                                    |        |         |       | Ce2 | 1.93  |
|                                    |        |         |       | Ce3 | 0.26  |
| Ru <sub>6</sub> /CeO <sub>2</sub>  | -10.47 | Ru1-Ru2 | 2.365 | Ru1 | -0.18 |
|                                    |        | Ru1-Ru3 | 2.342 | Ru2 | 1.0   |
|                                    |        | Ru1-Ru6 | 2.240 | Ru3 | 0.68  |
|                                    |        | Ru2-Ru3 | 2.499 | Ru4 | -0.15 |
|                                    |        | Ru2-Ru5 | 2.269 | Ru5 | 0.06  |
|                                    |        | Ru3-Ru4 | 2.270 | Ru6 | -0.09 |
|                                    |        | Ru4-Ru5 | 2.605 | O1  | -0.94 |
|                                    |        | Ru4-Ru6 | 2.313 | O2  | -1.24 |
|                                    |        | Ru5-Ru6 | 2.356 | O3  | -1.01 |
|                                    |        | Ru2-O1  | 1.949 | O4  | -1.07 |
|                                    |        | Ru2-O2  | 1.974 | O5  | -0.95 |
|                                    |        | Ru3-O3  | 1.818 | O6  | -1.24 |
|                                    |        | Ru5-O4  | 2.019 | O7  | -1.38 |
|                                    |        | Ru5-O5  | 1.978 | Ce1 | 2.21  |
|                                    |        |         |       | Ce2 | 2.45  |
|                                    |        |         |       | Ce3 | 1.93  |
| Ru <sub>10</sub> /CeO <sub>2</sub> | -11.46 | Ru1-Ru2 | 2.270 | Ru1 | -0.22 |
|                                    |        | Ru1-Ru5 | 2.379 | Ru2 | 0.45  |
|                                    |        | Ru1-Ru6 | 2.303 | Ru3 | 0.19  |
|                                    |        | Ru2-Ru3 | 2.502 | Ru4 | 0.97  |
|                                    |        | Ru2-Ru7 | 2.233 | Ru5 | 0.27  |

---

|          |       |      |       |
|----------|-------|------|-------|
| Ru3-Ru4  | 2.300 | Ru6  | 0.02  |
| Ru3-Ru8  | 2.242 | Ru7  | -0.28 |
| Ru4-Ru5  | 2.341 | Ru8  | 0.3   |
| Ru4-Ru9  | 2.312 | Ru9  | -0.24 |
| Ru5-Ru10 | 2.265 | Ru10 | 0.31  |
| Ru6-Ru7  | 2.293 | O1   | -0.98 |
| Ru6-Ru10 | 2.292 | O2   | -0.42 |
| Ru7-Ru8  | 2.415 | O3   | -1.26 |
| Ru8-Ru9  | 2.298 | O4   | -0.72 |
| Ru9-Ru10 | 2.290 | O5   | -1.18 |
| Ru1-O1   | 1.877 | O6   | -1.04 |
| Ru2-O3   | 1.971 | Ce1  | 2.36  |
| Ru3-O3   | 1.929 | Ce2  | -0.04 |
| Ru4-O5   | 1.797 | Ce3  | 1.71  |
| Ru5-O6   | 1.901 |      |       |

Table S2 Calculated N-Ru bond length ( $L_{N-Ru}$ ) of  $N_2$  adsorbed on  $Ru_n$  ( $n=1-6,10$ )/ $CeO_2(110)$  in end-on and side-on modes.

| $Ru_n/CeO_2(110)$ | $L_{N-Ru} / \text{\AA}$ |        |         |        |
|-------------------|-------------------------|--------|---------|--------|
|                   | End-on                  |        | Side-on |        |
|                   | N-Ru                    | length | N-Ru    | length |
| $Ru_1/CeO_2$      | N2-Ru1                  | 1.863  | N1-Ru1  | 2.201  |
|                   |                         |        | N2-Ru1  | 2.156  |
| $Ru_2/CeO_2$      | N2-Ru1                  | 1.976  | N2-Ru1  | 2.048  |
|                   |                         |        | N2-Ru1  | 2.139  |
|                   |                         |        | N1-Ru2  | 2.062  |
|                   |                         |        | N2-Ru2  | 2.115  |
| $Ru_3/CeO_2$      | N2-Ru3                  | 1.951  | N1-Ru3  | 1.982  |
|                   |                         |        | N2-Ru2  | 1.948  |
| $Ru_4/CeO_2$      | N2-Ru4                  | 1.953  | N1-Ru1  | 2.012  |
|                   |                         |        | N2-Ru4  | 2.113  |
| $Ru_5/CeO_2$      | N2-Ru1                  | 1.950  | N1-Ru2  | 1.993  |
|                   |                         |        | N2-Ru1  | 1.873  |
| $Ru_6/CeO_2$      | N2-Ru6                  | 1.974  | N1-Ru4  | 2.023  |
|                   |                         |        | N2-Ru6  | 1.998  |
| $Ru_{10}/CeO_2$   | N2-Ru8                  | 1.950  | N1-Ru8  | 2.221  |
|                   |                         |        | N2-Ru8  | 2.079  |

Table S3 Calculated Bader charge of N atom in the gas N<sub>2</sub> and the end-on and side on adsorbed N<sub>2</sub> on Ru<sub>n</sub> (n=1-6, 10)/CeO<sub>2</sub>(110).

| Species                                 | Bader charge of N /  e             |      | Bader charge of N /  e |      |      |
|-----------------------------------------|------------------------------------|------|------------------------|------|------|
|                                         | 5.11                               |      | 4.89                   |      |      |
|                                         | End-on                             |      | Side-on                |      |      |
| gas N <sub>2</sub>                      |                                    |      |                        |      |      |
|                                         | Ru <sub>1</sub> /CeO <sub>2</sub>  | 5.26 | 5.10                   | 5.17 | 5.15 |
|                                         | Ru <sub>2</sub> /CeO <sub>2</sub>  | 5.39 | 5.00                   | 5.61 | 5.37 |
| N <sub>2</sub> on                       | Ru <sub>3</sub> /CeO <sub>2</sub>  | 5.57 | 4.97                   | 5.46 | 5.36 |
| Ru <sub>n</sub> /CeO <sub>2</sub> (110) | Ru <sub>4</sub> /CeO <sub>2</sub>  | 5.40 | 5.06                   | 5.38 | 5.31 |
|                                         | Ru <sub>5</sub> /CeO <sub>2</sub>  | 5.73 | 4.75                   | 5.51 | 5.37 |
|                                         | Ru <sub>6</sub> /CeO <sub>2</sub>  | 5.42 | 5.00                   | 5.31 | 5.38 |
|                                         | Ru <sub>10</sub> /CeO <sub>2</sub> | 5.78 | 4.63                   | 5.20 | 5.33 |

Table S4 The Gibbs free energy change of N<sub>2</sub> ( $\Delta G(^*N_2)$ ) and H ( $\Delta G(^*H)$ ) adsorption on Ru<sub>n</sub>/CeO<sub>2</sub>(110).

| Ru <sub>n</sub> /CeO <sub>2</sub> (110) | $\Delta G(^*N_2)$ /eV |         | $\Delta G(^*H)$ /eV |
|-----------------------------------------|-----------------------|---------|---------------------|
|                                         | end on                | side on |                     |
| Ru <sub>1</sub> /CeO <sub>2</sub>       | -0.96                 | -0.35   | -0.06               |
| Ru <sub>2</sub> /CeO <sub>2</sub>       | 0.30                  | 0.77    | -0.01               |
| Ru <sub>3</sub> /CeO <sub>2</sub>       | -0.56                 | -0.22   | -0.92               |
| Ru <sub>4</sub> /CeO <sub>2</sub>       | -0.30                 | 0.30    | -0.24               |
| Ru <sub>5</sub> /CeO <sub>2</sub>       | -0.28                 | 0.12    | -0.33               |
| Ru <sub>6</sub> /CeO <sub>2</sub>       | -0.56                 | -0.03   | -0.39               |
| Ru <sub>10</sub> /CeO <sub>2</sub>      | -0.72                 | -0.25   | -0.84               |

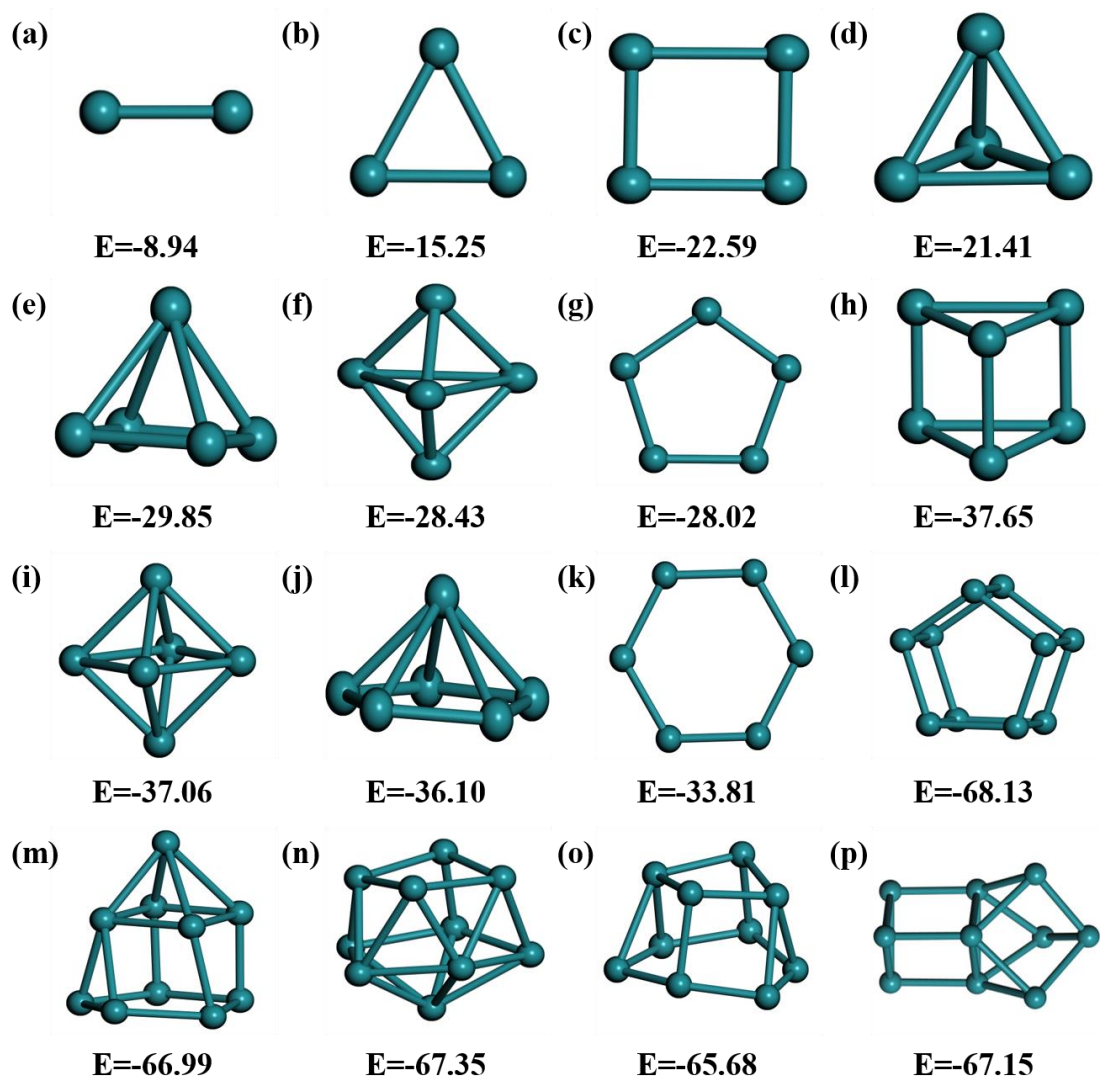

Figure S1. Configurations of  $Ru_n$  ( $n=2-6,10$ ) cluster. The values in figure indicate the calculated total energy in eV by DFT.

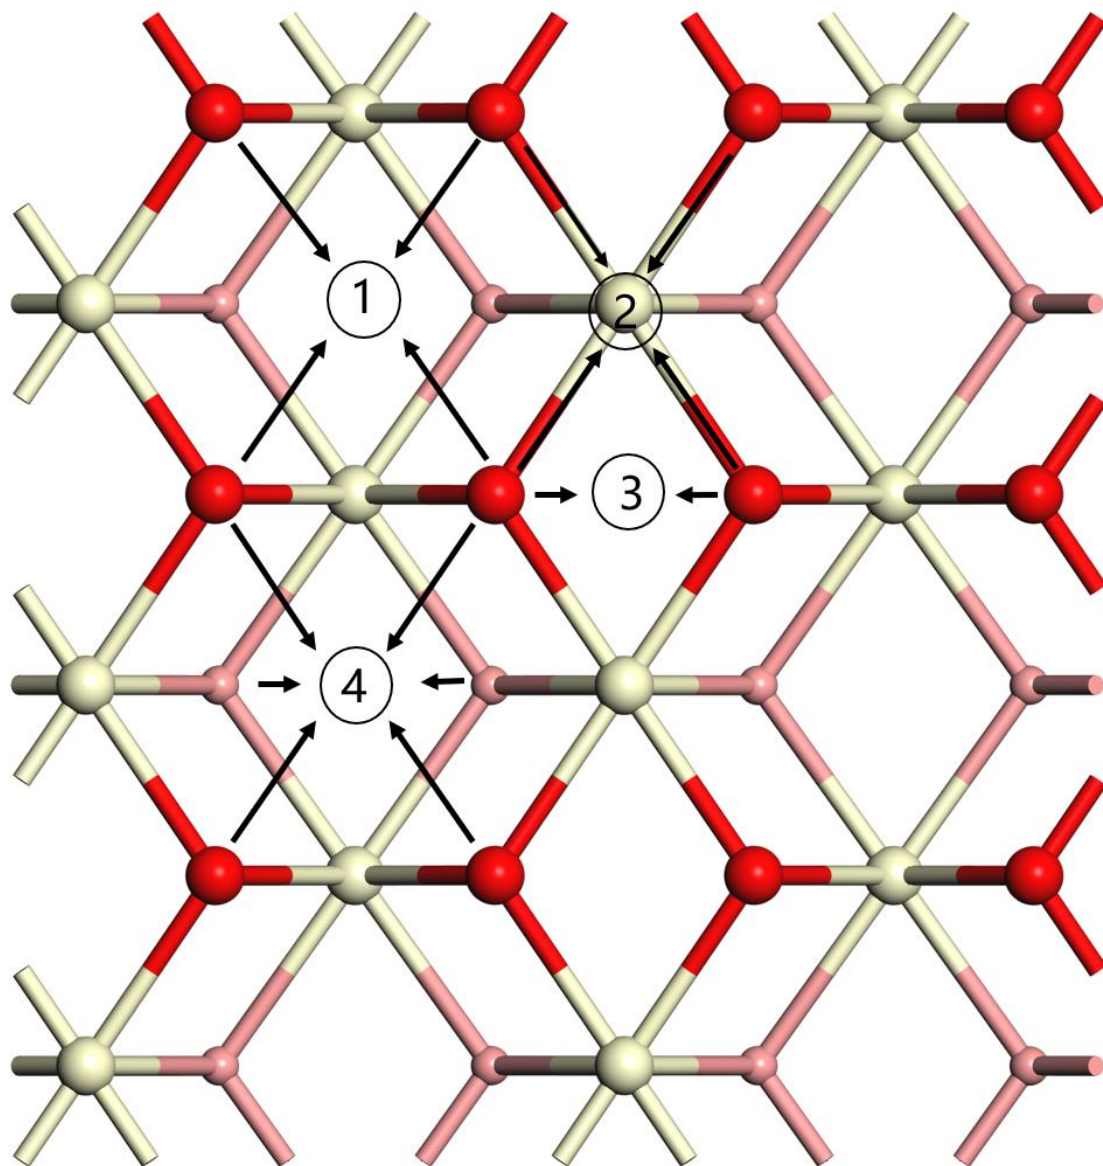

Figure S2. Possible location sites of  $\text{Ru}_n$  ( $n=1-6,10$ ) on  $\text{CeO}_2(110)$ . Color code: surface O: red; second layer O: pink; Ce: yellow.

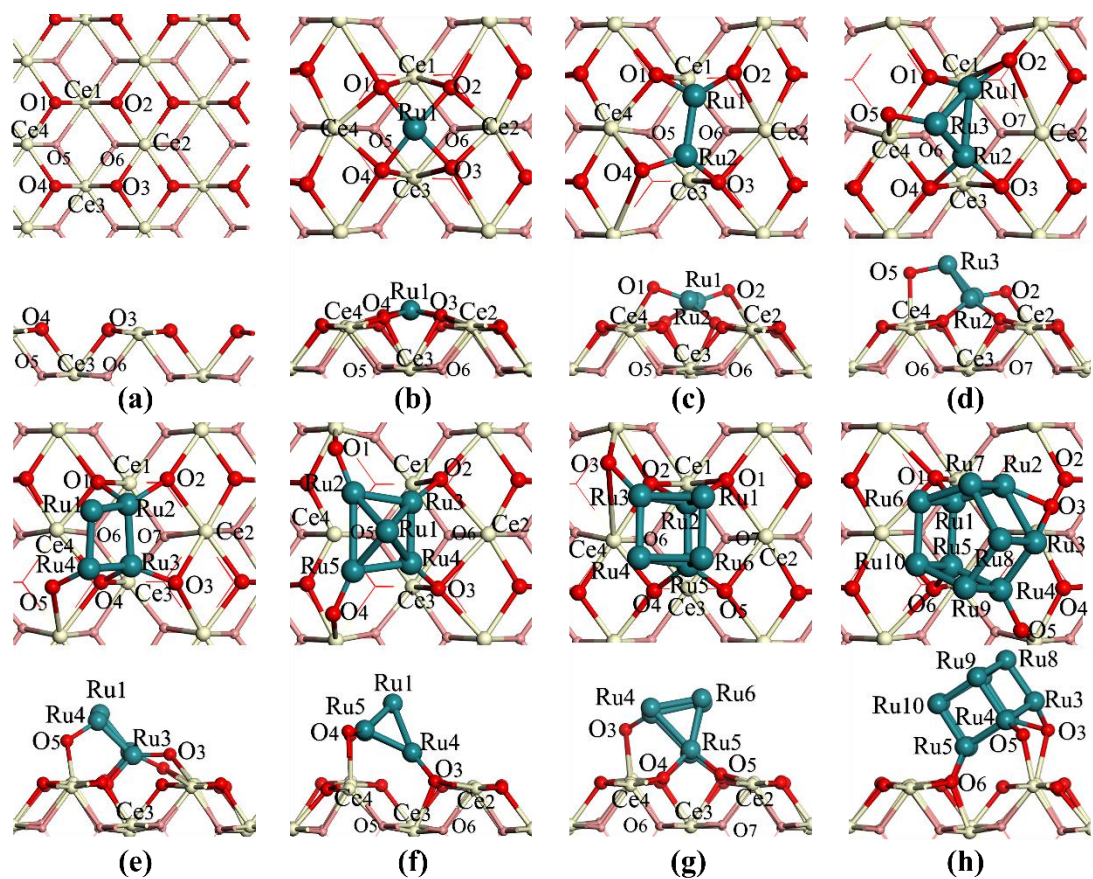

Figure S3. Top views of  $\text{CeO}_2(110)$  and  $\text{Ru}_n(n=1-6,10)/\text{CeO}_2(110)$ . (a)  $\text{CeO}_2(110)$ , (b)  $\text{Ru}_1/\text{CeO}_2(110)$ , (c)  $\text{Ru}_2/\text{CeO}_2(110)$ , (d)  $\text{Ru}_3/\text{CeO}_2(110)$ , (e)  $\text{Ru}_4/\text{CeO}_2(110)$ , (f)  $\text{Ru}_5/\text{CeO}_2(110)$ , (g)  $\text{Ru}_6/\text{CeO}_2(110)$ , (h)  $\text{Ru}_{10}/\text{CeO}_2(110)$ . Color scheme: oxygen: red (surface O), pink (third layer O), Ce: yellow, Ru: cyan.



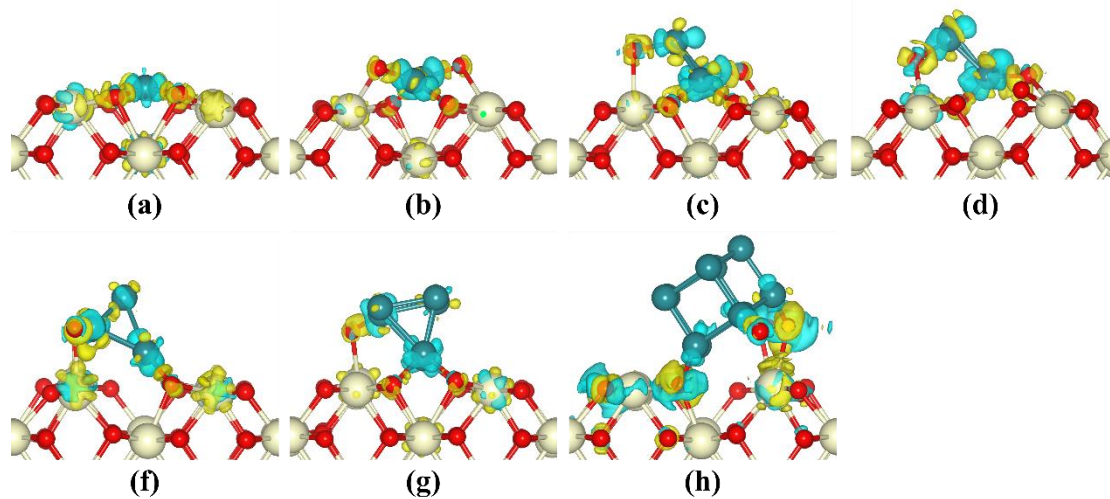

Figure S4. Calculated differential charge density of Ru<sub>n</sub>(*n*=1-6,10)/CeO<sub>2</sub>(110). The yellow and cyan regions represent the accumulation and consumption of electrons, respectively. Color code: O: red; Ce: yellow; Ru: cyan.

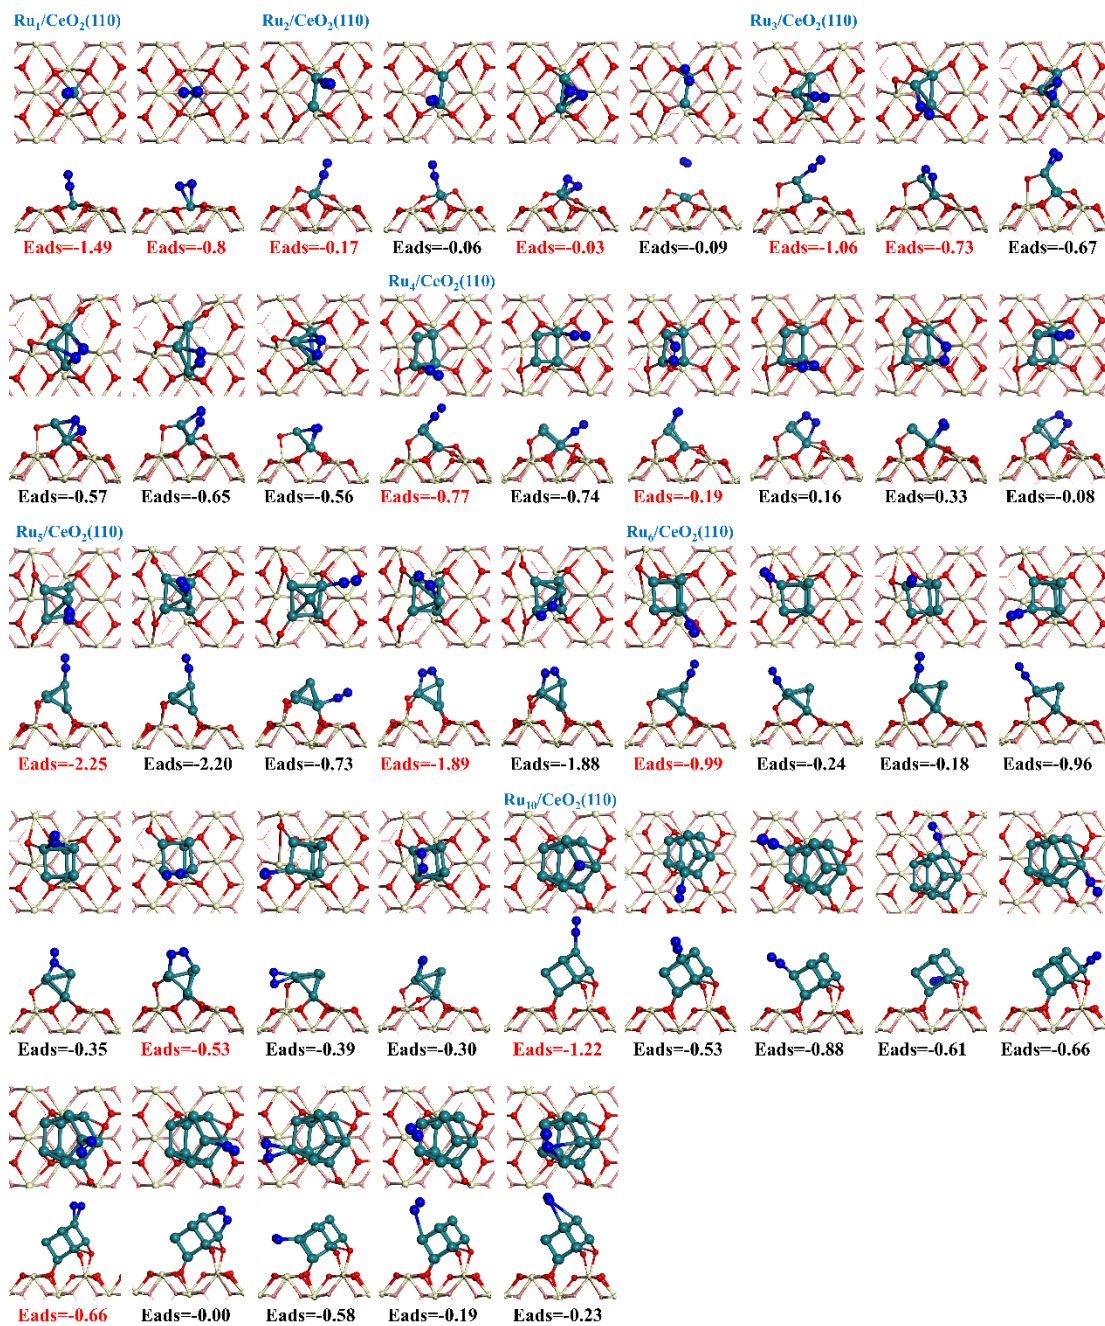

Figure S5. The top and side views of  $N_2$  adsorbed at different site on  $Ru_n(n=1-6,10)/CeO_2(110)$  with the values of adsorption energy ( $E_{ads}$ , unit in eV). Color code: O: red; Ce: yellow; Ru: cyan; N: blue.

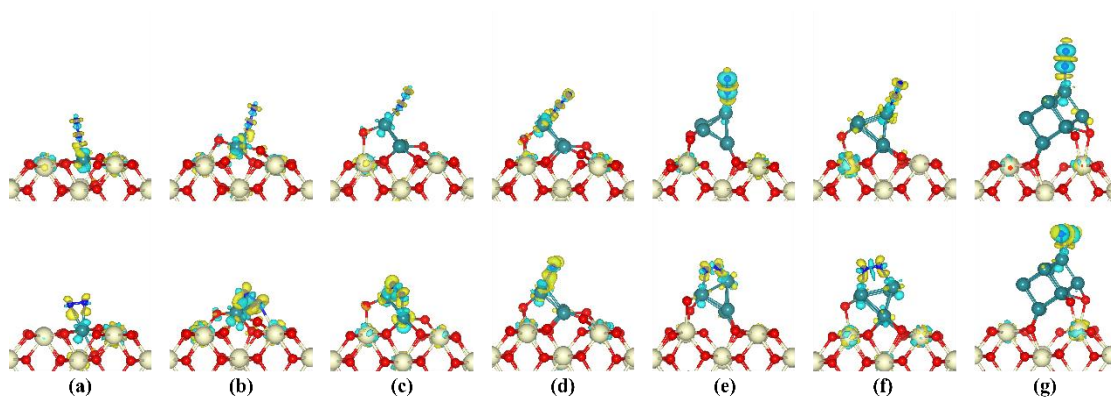

Figure S6. Calculated differential charge density of  $N_2$  adsorbed on  $Ru_n(n=1-6,10)/CeO_2(110)$  in end-on and side-on modes. The yellow and cyan regions represent the accumulation and consumption of electrons, respectively. Color code: O: red; Ce: yellow; Ru: cyan; N: blue.

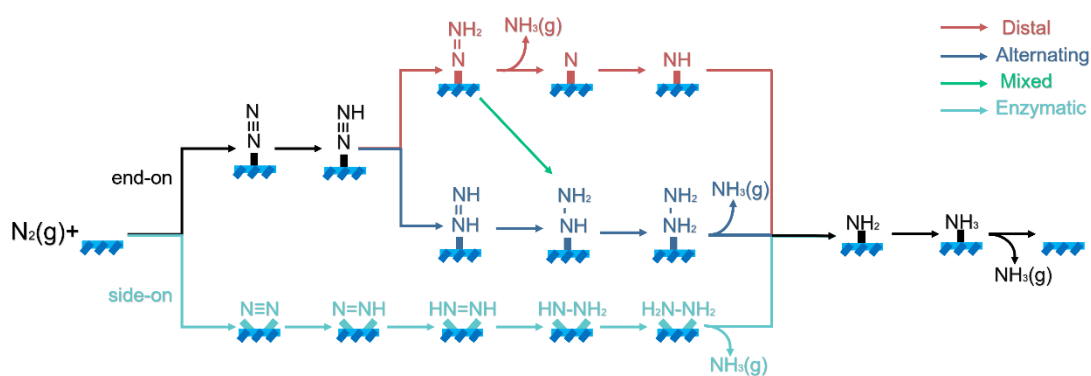

Figure S7. Scheme of possible associative reaction pathways of nitrogen reduction, i.e. the distal, alternating, enzymatic and mixed pathways.

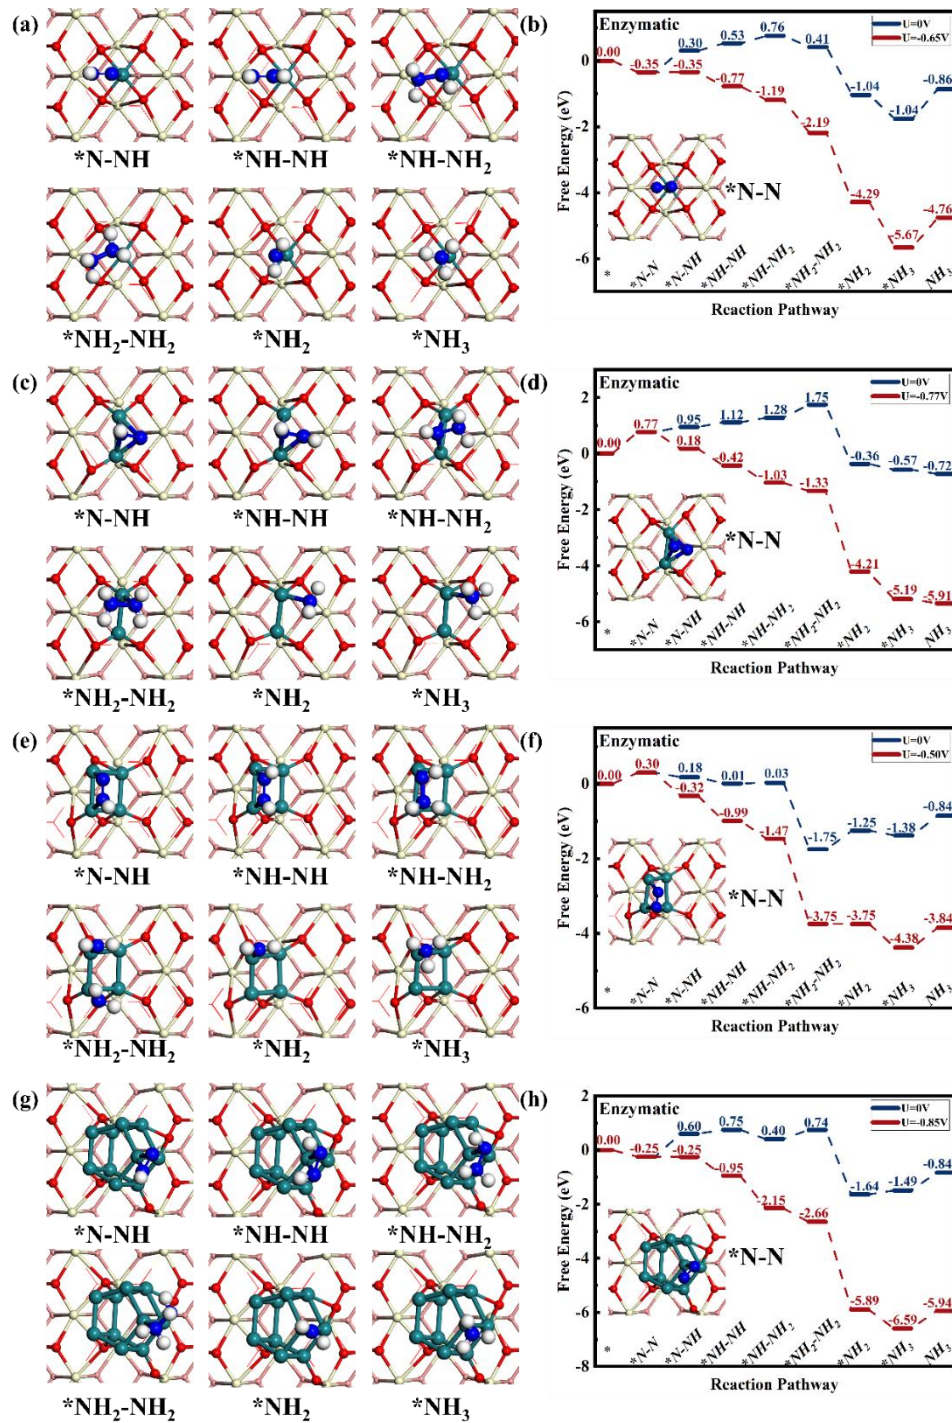

Figure S8. The optimized geometries and energy profiles of NRR on  $Ru_n$  ( $n=1,2,4,10$ )/ $CeO_2(110)$  along enzymatic pathway. (a), (b)  $Ru_1/CeO_2(110)$ ; (c), (d)  $Ru_2/CeO_2(110)$ ; (e), (f)  $Ru_4/CeO_2(110)$ ; (g), (h)  $Ru_{10}/CeO_2(110)$ . Color code: surface O: red; second layer O: pink; Ce: yellow; Ru: cyan; N: blue; H: white.

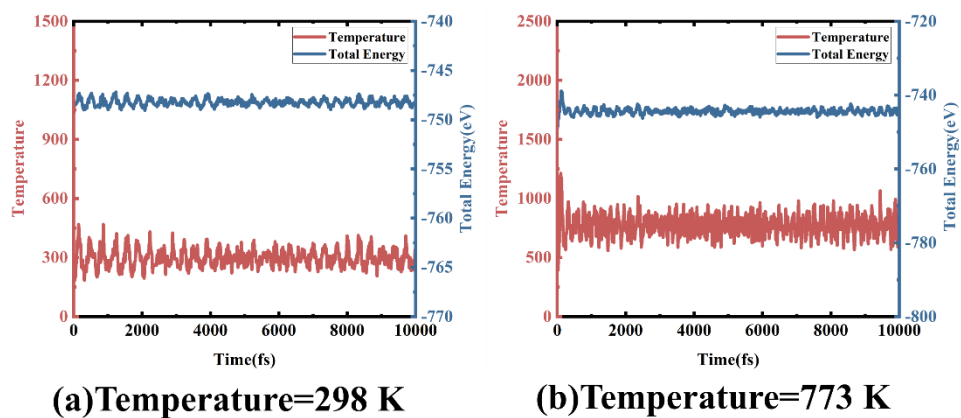

Figure S9. Temperature and energy evolution of Ru<sub>3</sub>/CeO<sub>2</sub>(110) simulated by AIMD at 298 and 773 K, respectively. (a) 298K; (b) 773K.
